# Supplementary material for: Identification of novel bromodomain inhibitors of Trypanosoma cruzi bromodomain factor 2 (TcBDF2) using a fluorescence polarization-based high-throughput assay
Source: PubMed Central journal article supplement (PMC11304739; doi:10.1128/aac.00243-24), 2024-07-19
Supplement: aac.00243-24-s0001.pdf [file aac.00243-24-s0001.pdf]

**SUPPLEMENTARY METHODS AND FIGURES FOR : Identification of novel Bromodomain inhibitors of Trypanosoma cruzi Bromodomain Factor 2 (TcBDF2) using a fluorescence polarization-base high-throughput assay**

Luis E. Tavernelli,<sup>1,3,†</sup> Victoria L. Alonso,<sup>1,2</sup> Imanol Peña,<sup>3</sup> Elvio Rodríguez Araya,<sup>1,2</sup> Romina Manarin,<sup>2</sup> Juan Cantizani,<sup>3</sup> Julio Martín,<sup>3,‡</sup> Juan Salamanca,<sup>3</sup> Paul Bamborough,<sup>4</sup> Felix Calderón,<sup>3</sup> Raquel Gabarro,<sup>3</sup> Esteban Serra<sup>1,2</sup>

1 Instituto de Biología Molecular y Celular de Rosario, CONICET, Rosario, Argentina.

2 Facultad de Ciencias Bioquímicas y Farmacéuticas, Universidad Nacional de Rosario, Rosario, Argentina.

3 GlaxoSmithKline Global Health, Tres Cantos, 28760, Madrid, Spain.

4 Molecular Design, GlaxoSmithKline, Gunnels Wood Road, Stevenage, Herts, SG1 2NY, UK

† Current address: School of Infection and Immunity. University of Glasgow, Glasgow, Scotland, UK.

‡ Current address: Sciengement Lab Consulting, 28750 San Agustin del Guadalix, Spain.

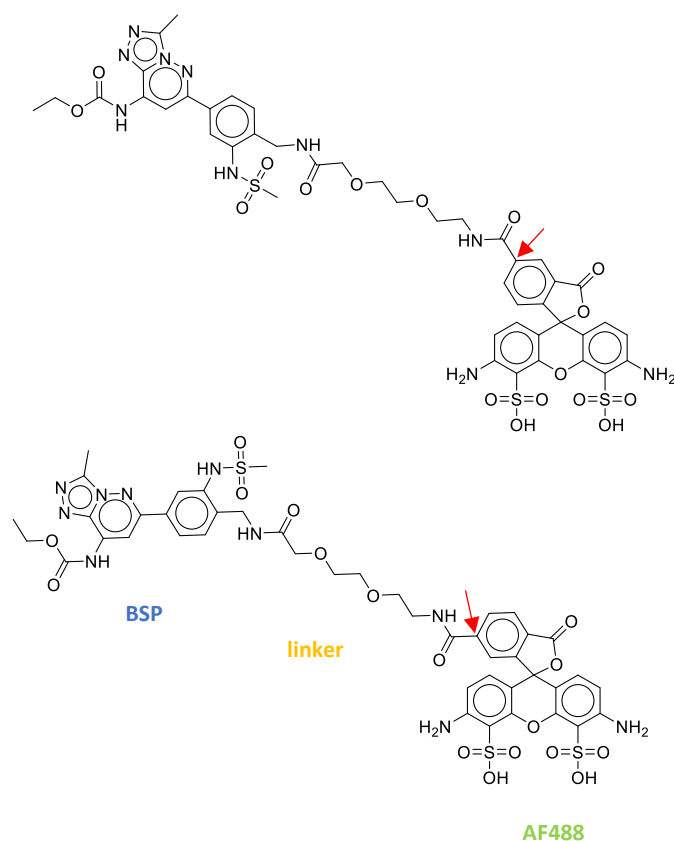

**Figure S1: AlexaFluor-488 coupled to BSP.** Mixture of regioisomers that differ at the atom on the benzene ring where the linker is bonded to the fluorophore (indicated with red arrows).

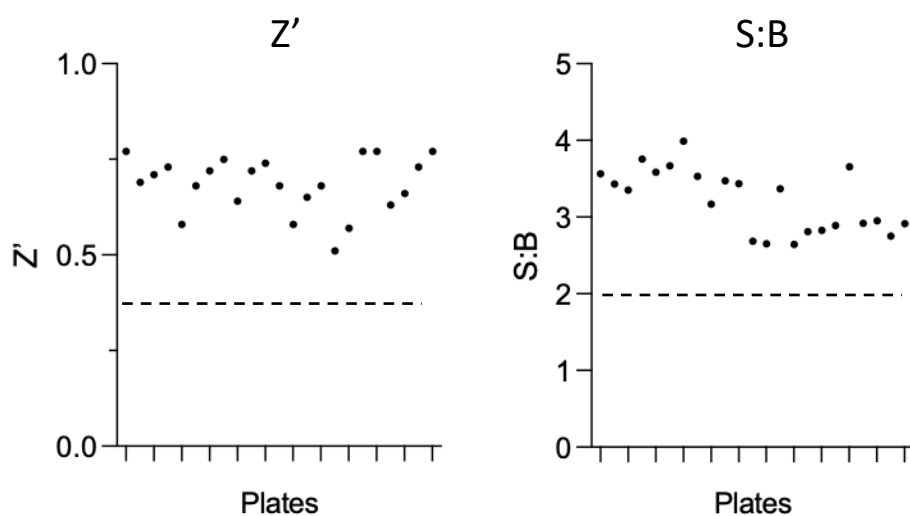

**Figure S2:** Quality control parameters used in this screening were applied to all plates. The  $Z'$  score (left panel) and the signal-to-noise ratio (S:B, right panel) were measured. The dotted line represents the threshold values: 0.4 for the  $Z'$  score and 2 for the S:B ratio.

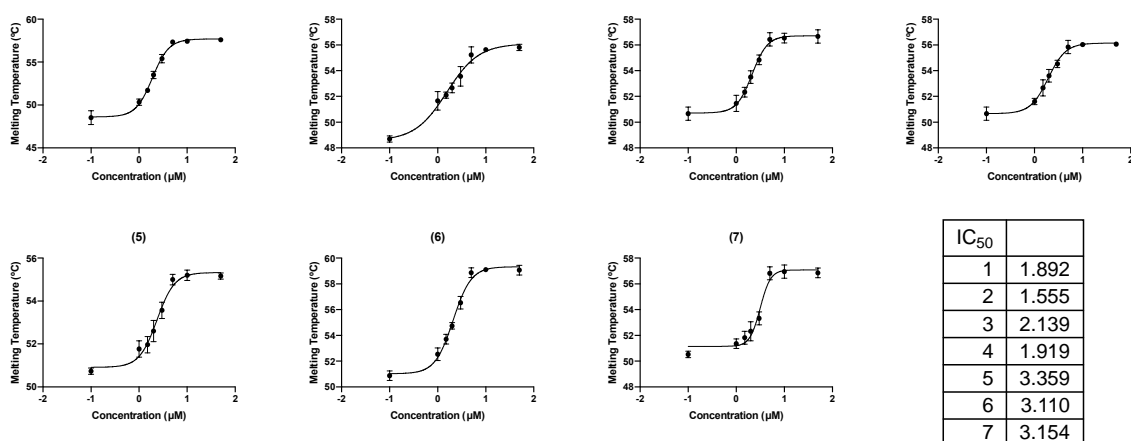

**Figure S3:  $K_d$  calculation using DSF (second round of experiments).** Six concentrations of each compound were used (from 0.1 to 50  $\mu\text{M}$ ) and the melting temperatures of  $TcBD2$  with each concentration of compound obtained were used to calculate the  $K_d$ s. DMSO was used as a control sample. All thermal shift assays were performed at least in triplicate with reproducibility of parameters within  $\pm 10\%$ . The change of melting temperature versus the log of the ligand concentration was plotted and fitted as described in the Methods section.

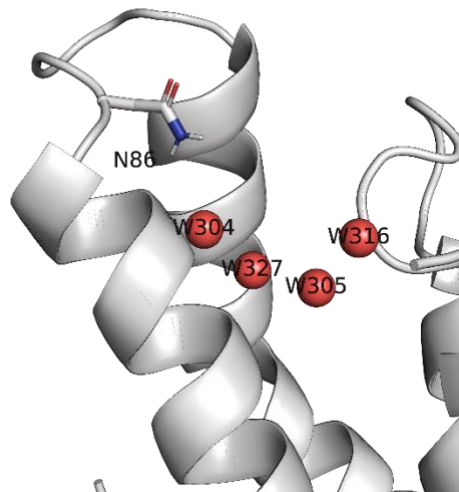

**Figure S4: Structure of *TcBDF2* and the water network.** Bromodomain structure with the conserved water molecules highlighted as red spheres. The four waters are referred to as W304, W305, W316, and W327.

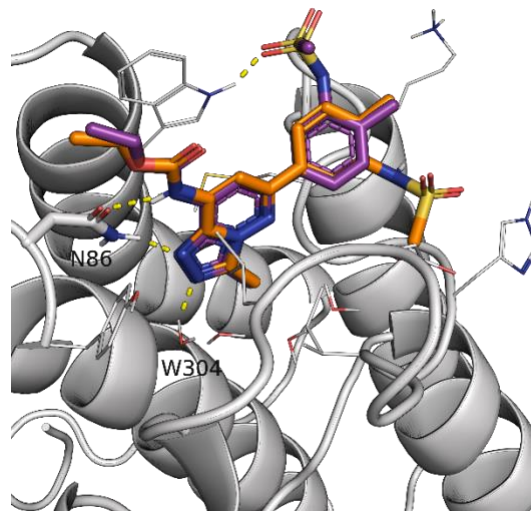

**Figure S5: Binding mode validation of the docking protocol.** Bromosporine (orange) was docked into the AcK pocket of *TcBDF2* (PDBid 6NIM) obtaining an almost identical conformation as the X-ray ligand (purple) (core RMSD = 0.31 Å). Hydrogen bonds are shown in yellow dot lines.

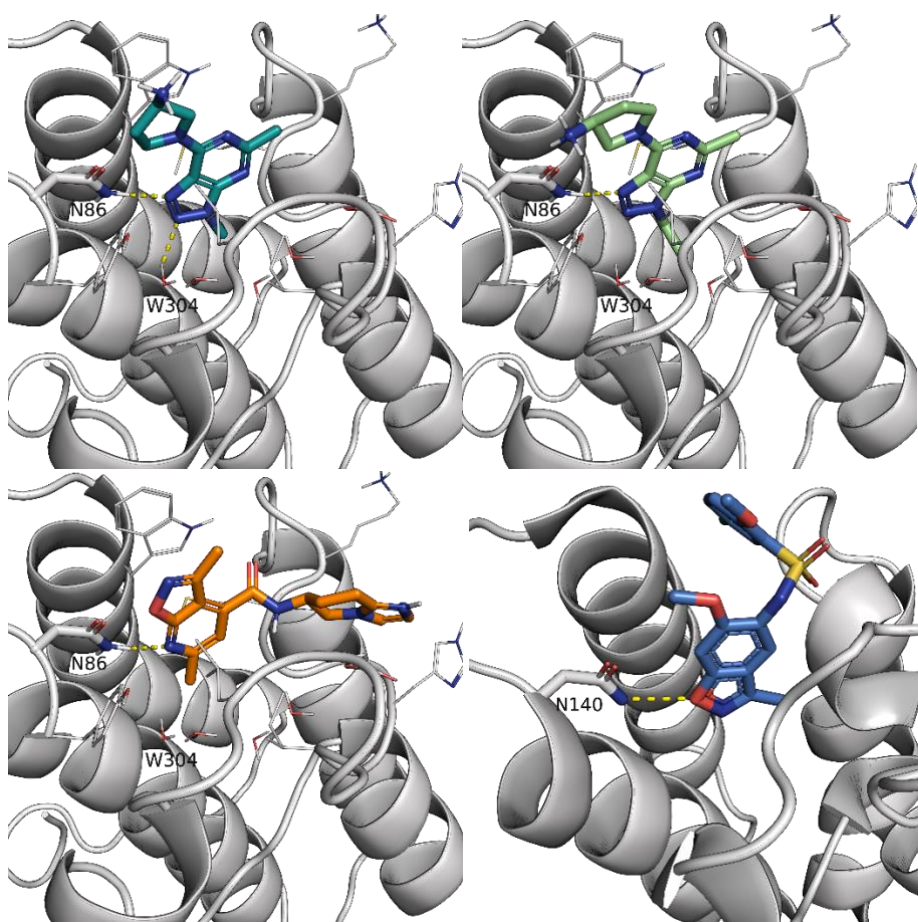

**Figure S6: Binding mode prediction of compounds against *TcBDF2* and X-ray crystal structure of BRD4.** Docked poses of compound 1 (dark cyan), 2 (green), 3 (orange), 3m (blue) and BRD4 (PDBid 5Y8C). Hydrogen bonds are shown in yellow dot lines.

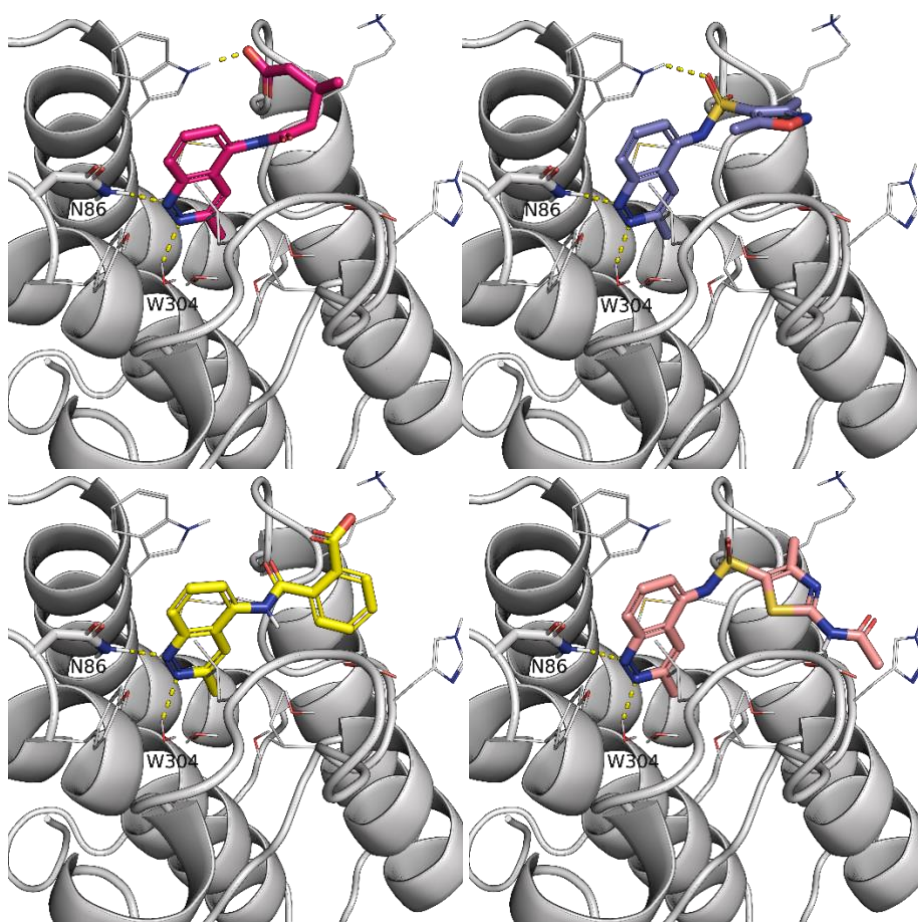

**Figure S7: Binding mode prediction of compounds against TcBDF2.** Docked poses of compound 4 (dark pink), 5(purple), 6(yellow) and 7(pink). Hydrogen bonds are shown in yellow dot lines.
